# Supplementary material for: When Antimicrobial Stewardship Isn′t Watching: The Educational Impact of Critical Care Prospective Audit and Feedback
Source: PubMed Central journal article supplement — Open Forum Infect Dis. 2016 May 30;3(3):ofw115. doi: 10.1093/ofid/ofw115 (PMC4929488; doi:10.1093/ofid/ofw115), 2016-05-30
Supplement: supp_ofw115_ofw115supp_fig.pdf [file supp_ofw115_ofw115supp_fig.pdf]

Figure 2. Specific Antimicrobial Use in ICU A, B and C Pre and Post Prospective Audit and Feedback (PAF) Implementation at ICU A

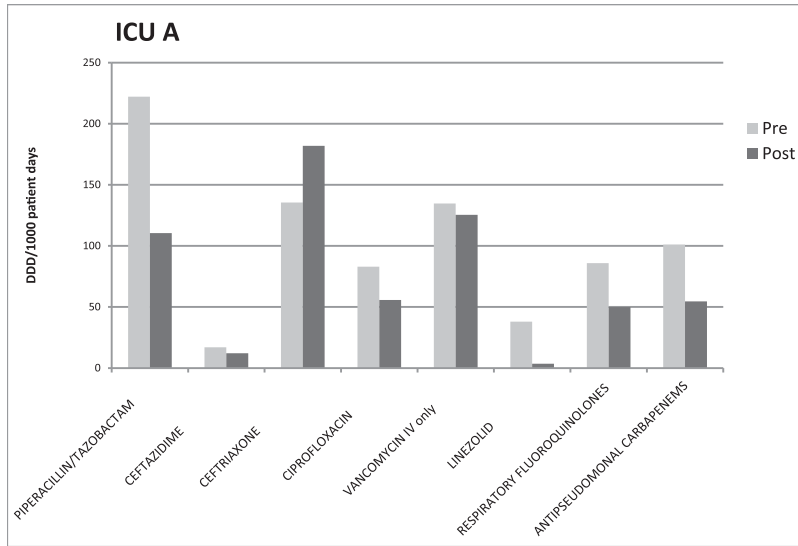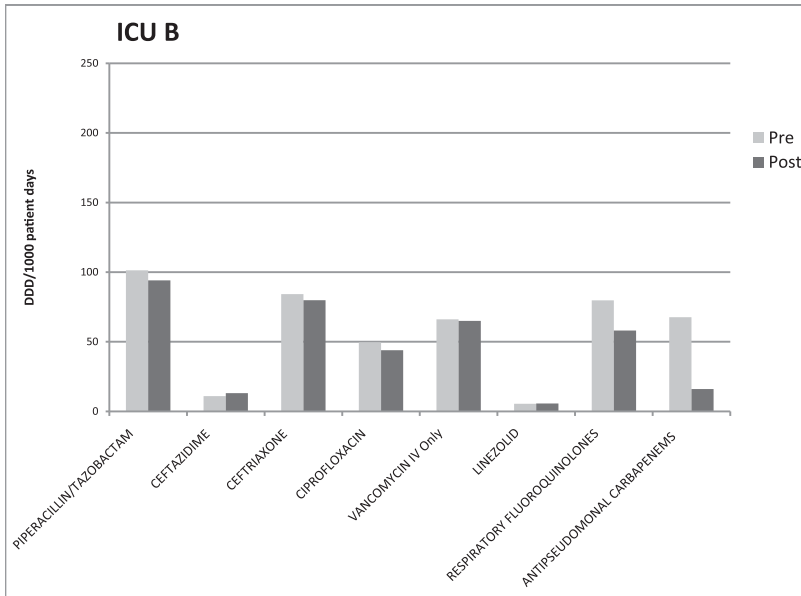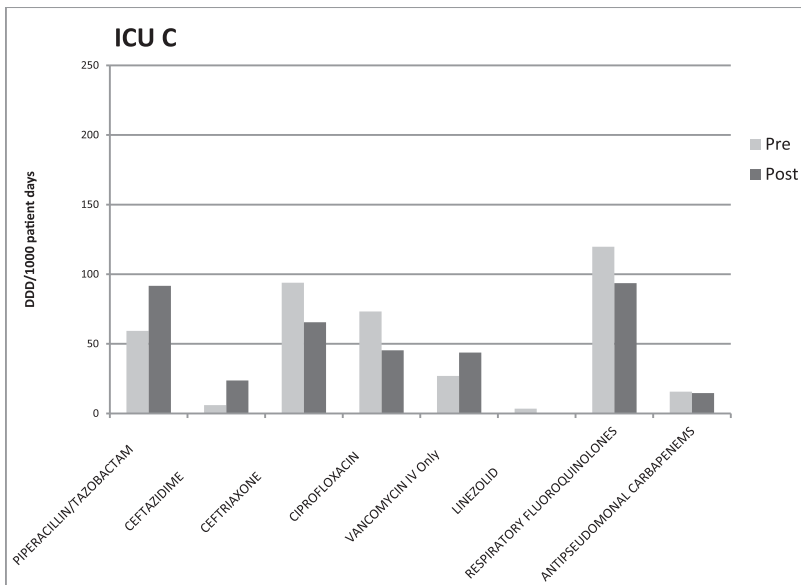

Pre PAF Implementation: Jul 2012 to Jun 2013  
 Post PAF Implementation: Jul 2013 to Mar 2014
